# Supplementary material
Source: Springer Nature journal article supplement (https://www.springermedizin.de/resource/supplementary/12916_2012_605_MOESM3_ESM.pdf/9597970)

### Efficacy

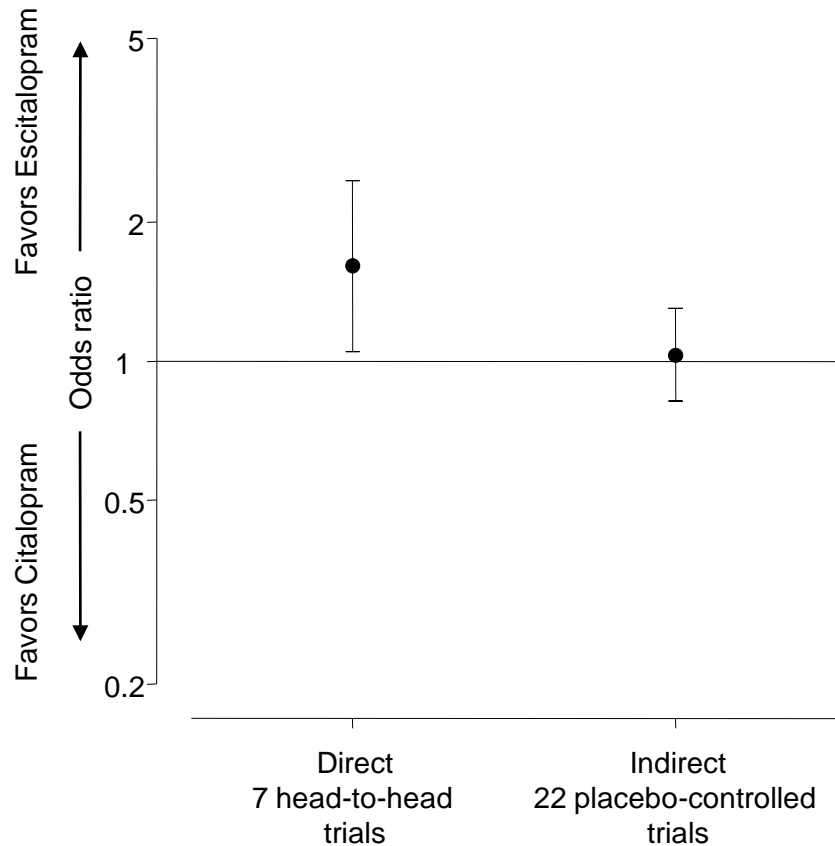

Inconsistency test  $P$  value = 0.07

### Acceptability

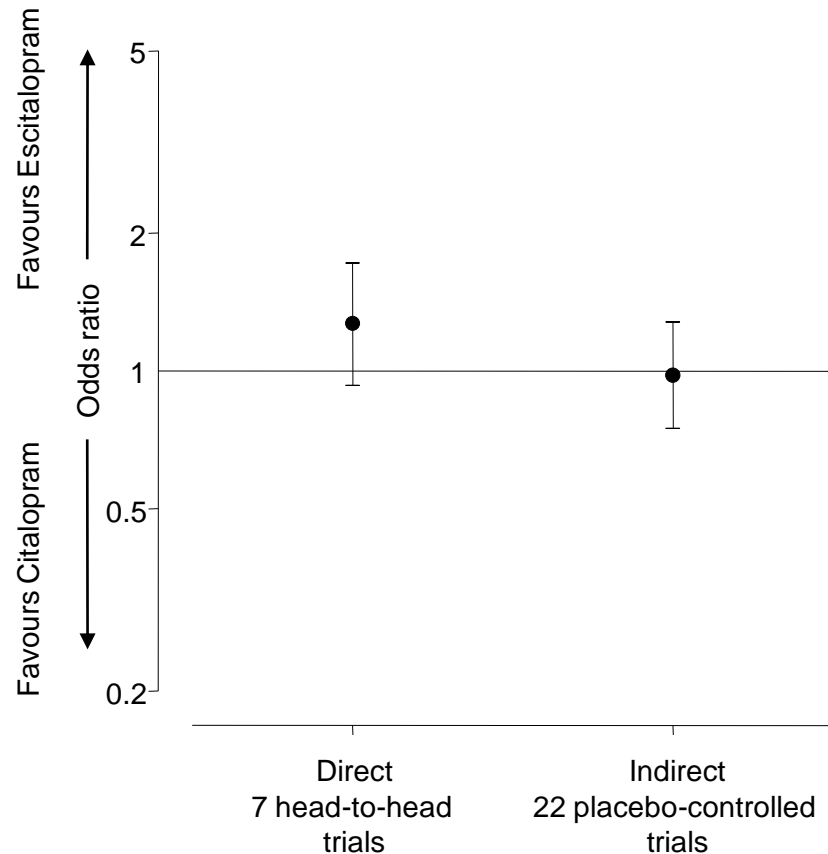

Inconsistency test  $P$  value = 0.21

Supplement: MOESM3 [file 9597970]
